# Supplementary material
Source: PubMed Central journal article supplement (PMC3962529)
Supplement: epi-9-194-s01.pdf [file epi-9-194-s01.pdf]

## **Supplemental Material to:**

**Pauline MW van Kempen, Rob Noorlag, Weibel W Braunius,  
Inge Stegemans, Stefan M Willems, and Wilko Grolman**

**Differences in methylation profiles between HPV-positive  
and HPV-negative oropharynx squamous cell carcinoma:  
A systematic review**

**Epigenetics 2014; 9(2)**

**<http://dx.doi.org/10.4161/epi.26881>**

**[http://www.landesbioscience.com/journals/epigenetics/  
article/26881](http://www.landesbioscience.com/journals/epigenetics/article/26881)**

Supplemental Material.

Date search: 12<sup>th</sup> June 2013

(((((((((((((Epigenomic[Title/Abstract] OR epigenomics[Title/Abstract]) OR  
Epigenetic[Title/Abstract] OR Epigenetics[Title/Abstract] OR  
Hypomethylation[Title/Abstract] OR Hypomethylations[Title/Abstract] OR  
Hypermethylations[Title/Abstract] OR Hypermethylation[Title/Abstract])))))) OR  
(((((((((((((((Methylation[Title/Abstract] OR Methylations[Title/Abstract] OR  
deacetylation[Title/Abstract] OR deacetylations[Title/Abstract] OR  
deacetylated[Title/Abstract] OR acetylated[Title/Abstract] OR acetylation[Title/Abstract]  
OR acetylations[Title/Abstract] OR methylated[Title/Abstract] OR  
hypermethylated[Title/Abstract] OR hypomethylated[Title/Abstract] OR  
Epigenomics[MeSH Terms])))) OR epigenetically[Title/Abstract]))) AND  
((((((((((((((((((((((((tumor[Title/Abstract] OR tumors[Title/Abstract] OR  
tumor[Title/Abstract] OR tumors[Title/Abstract] OR carcinoma[Title/Abstract] OR  
carcinomas[Title/Abstract] OR cancer[Title/Abstract] OR cancers[Title/Abstract] OR  
malignancy[Title/Abstract] OR malignancies[Title/Abstract] OR  
neoplasm[Title/Abstract] OR neoplasms[Title/Abstract] OR SCC[Title/Abstract] OR  
SCCs[Title/Abstract] OR oncology[Title/Abstract] OR oncological[Title/Abstract] OR  
malignant[Title/Abstract] OR malignance[Title/Abstract] OR  
cancerous[Title/Abstract])))))) AND (((((((base[Title/Abstract] AND  
tongue[Title/Abstract])) OR pharynx[Title/Abstract] OR pharyngeal[Title/Abstract])) OR  
((((((((otolaryngological[Title/Abstract] OR otolaryngologic[Title/Abstract] OR  
otolaryngology[Title/Abstract] OR otorhinolaryngology[Title/Abstract] OR  
((((((((Glossotonsillar sulcus[Title/Abstract] OR Soft palate[Title/Abstract])) OR  
((((((((((((((((oropharynx[Title/Abstract] OR oropharyngeal[Title/Abstract] OR  
vallecula[Title/Abstract] OR valleculas[Title/Abstract] OR tonsil[Title/Abstract] OR  
tonsils[Title/Abstract] OR tonsillar[Title/Abstract] OR uvula[Title/Abstract] OR  
uvulas[Title/Abstract] OR uvulae[Title/Abstract] OR palatina arch[Title/Abstract] OR  
base of tongue[Title/Abstract])))]))) OR (((((((OPSCC[Title/Abstract] OR  
HNSCC[Title/Abstract] OR Head neck squamous cell carcinoma[Title/Abstract])))
